# Supplementary material for: Postprandial Glucose Variability Following Typical Meals in Youth Living with Type 1 Diabetes
Source: MDPI journal article supplement (doi:10.3390/nu16010162), 2024-01-04
Supplement: s1 [file s1]

**Supplemental Table S1. Postprandial Characteristics**

|                                     | Overall            | Carbohydrates      |                    |                   |                   | Fat                |                   |                    | Protein            |                   |                    |
|-------------------------------------|--------------------|--------------------|--------------------|-------------------|-------------------|--------------------|-------------------|--------------------|--------------------|-------------------|--------------------|
|                                     |                    | <25 g              | 25-<50 g           | 50-<75 g          | ≥75 g             | <10 g              | 10-<30 (g)        | ≥30 g              | <0.25 g/kg         | 0.25-<0.50 g/kg   | ≥0.50 g/kg         |
| # of Meals                          | 1980               | 507                | 603                | 458               | 412               | 695                | 815               | 470                | 1000               | 514               | 466                |
| Glucose before Meal                 | 144 ± 61           | 138 ± 62           | 144 ± 59           | 148 ± 61          | 148 ± 65          | 140 ± 63           | 147 ± 61          | 147 ± 59           | 141 ± 61           | 147 ± 62          | 149 ± 62           |
| % TIR 70-180 mg/dL                  | 75%<br>(39%, 100%) | 83%<br>(48%, 100%) | 72%<br>(36%, 100%) | 68%<br>(31%, 95%) | 72%<br>(37%, 94%) | 77%<br>(39%, 100%) | 72%<br>(33%, 97%) | 75%<br>(44%, 100%) | 75%<br>(39%, 100%) | 72%<br>(31%, 97%) | 75%<br>(44%, 100%) |
| Mean Glucose (mg/dL)                | 160 ± 57           | 150 ± 55           | 163 ± 56           | 166 ± 59          | 160 ± 58          | 157 ± 59           | 164 ± 58          | 156 ± 51           | 158 ± 57           | 164 ± 59          | 159 ± 54           |
| % Time >180 mg/dL                   | 17%<br>(0%, 61%)   | 0%<br>(0%, 48%)    | 21%<br>(0%, 64%)   | 25%<br>(0%, 69%)  | 17%<br>(0%, 58%)  | 11%<br>(0%, 58%)   | 19%<br>(0%, 66%)  | 17%<br>(0%, 56%)   | 16%<br>(0%, 58%)   | 20%<br>(0%, 69%)  | 17%<br>(0%, 56%)   |
| % Meals with Hyper event >250 mg/dL | 20%                | 16%                | 20%                | 25%               | 21%               | 21%                | 21%               | 19%                | 20%                | 22%               | 18%                |
| % Meals with Hypo event <70 mg/dL   | 11%                | 13%                | 9%                 | 10%               | 12%               | 13%                | 9%                | 10%                | 12%                | 10%               | 9%                 |
| % Meals with Hypo event <54 mg/dL   | 2%                 | 1%                 | 2%                 | 3%                | 2%                | 2%                 | 2%                | 2%                 | 2%                 | 2%                | 2%                 |
| Maximum glucose (mg/dL)             | 206 ± 68           | 190 ± 66           | 207 ± 65           | 215 ± 70          | 213 ± 71          | 201 ± 71           | 210 ± 68          | 204 ± 63           | 202 ± 68           | 212 ± 70          | 206 ± 66           |
| Time to peak (min)                  | 76<br>(39, 131)    | 75<br>(33, 127)    | 77<br>(44, 128)    | 78<br>(41, 136)   | 73<br>(38, 138)   | 75<br>(40, 127)    | 78<br>(41, 131)   | 73<br>(34, 137)    | 76<br>(40, 131)    | 76<br>(41, 131)   | 74<br>(36, 130)    |
| Excursion (mg/dL)                   | 52 (19, 92)        | 44 (12, 80)        | 52 (24, 92)        | 58 (21, 99)       | 50 (19, 96)       | 52 (20, 92)        | 54 (20, 98)       | 46 (16, 85)        | 52 (21, 92)        | 55 (20, 97)       | 47 (17, 87)        |

Data are Mean ± SD or Median (Quartiles) unless otherwise indicated.

**Supplemental Table S2. Effect of Insulin Modality and Macronutrients on Postprandial Glycemic Variability**

|                    | MDI/Pump |           | Closed Loop |           | Adjusted Mean Difference (95% CI) | Interaction P-value <sup>a</sup> |
|--------------------|----------|-----------|-------------|-----------|-----------------------------------|----------------------------------|
|                    | N        | Mean ± SD | N           | Mean ± SD |                                   |                                  |
| Glucose CV (%)     |          |           |             |           |                                   |                                  |
| Carbohydrates      |          |           |             |           |                                   | 0.41                             |
| <25 g              | 215      | 16% ± 8%  | 292         | 19% ± 9%  | -2.9% (-5.5%, -0.3%)              |                                  |
| 25 to <50 g        | 250      | 17% ± 9%  | 353         | 19% ± 9%  | -2.0% (-4.3%, 0.3%)               |                                  |
| 50 to <75 g        | 181      | 19% ± 10% | 277         | 20% ± 10% | -1.8% (-4.5%, 0.9%)               |                                  |
| ≥75 g              | 175      | 21% ± 10% | 237         | 21% ± 10% | -0.1% (-2.9%, 2.7%)               |                                  |
| Fat                |          |           |             |           |                                   | 0.32                             |
| <10 g              | 282      | 17% ± 9%  | 413         | 20% ± 9%  | -2.2% (-4.3%, 0.0%)               |                                  |
| 10 to <30 g        | 331      | 18% ± 9%  | 484         | 20% ± 10% | -1.8% (-3.9%, 0.2%)               |                                  |
| ≥30 g              | 208      | 19% ± 10% | 262         | 20% ± 10% | -1.0% (-3.7%, 1.6%)               |                                  |
| Protein            |          |           |             |           |                                   | 0.41                             |
| <0.25 g/kg         | 381      | 17% ± 9%  | 619         | 20% ± 10% | -2.2% (-4.0%, -0.3%)              |                                  |
| 0.25 to <0.50 g/kg | 228      | 18% ± 9%  | 286         | 20% ± 10% | -2.7% (-5.2%, -0.1%)              |                                  |
| ≥0.50 g/kg         | 212      | 20% ± 10% | 254         | 19% ± 10% | 0.2% (-2.4%, 2.9%)                |                                  |
| Glucose SD (mg/dL) |          |           |             |           |                                   |                                  |
| Carbohydrates      |          |           |             |           |                                   | 0.32                             |
| <25 g              | 215      | 23 ± 16   | 292         | 28 ± 14   | -4.5 (-8.9, -0.0)                 |                                  |
| 25 to <50 g        | 250      | 26 ± 14   | 353         | 30 ± 16   | -3.8 (-7.8, 0.3)                  |                                  |
| 50 to <75 g        | 181      | 32 ± 20   | 277         | 32 ± 17   | -0.6 (-5.3, 4.0)                  |                                  |
| ≥75 g              | 175      | 32 ± 18   | 237         | 33 ± 19   | 0.2 (-4.7, 5.0)                   |                                  |
| Fat                |          |           |             |           |                                   | 0.30                             |
| <10 g              | 282      | 26 ± 17   | 413         | 31 ± 17   | -4.0 (-7.8, -0.2)                 |                                  |
| 10 to <30 g        | 331      | 29 ± 17   | 484         | 31 ± 16   | -2.1 (-5.6, 1.3)                  |                                  |
| ≥30 g              | 208      | 29 ± 18   | 262         | 30 ± 17   | -0.4 (-4.9, 4.2)                  |                                  |
| Protein            |          |           |             |           |                                   | 0.41                             |
| <0.25 g/kg         | 381      | 26 ± 16   | 619         | 31 ± 17   | -3.4 (-6.6, -0.3)                 |                                  |
| 0.25 to <0.50 g/kg | 228      | 29 ± 17   | 286         | 32 ± 17   | -3.3 (-7.6, 1.1)                  |                                  |
| ≥0.50 g/kg         | 212      | 30 ± 20   | 254         | 30 ± 16   | 0.9 (-3.6, 5.5)                   |                                  |

a - P-value on the effect of insulin modality (MDI/pump or AID) on the relationship between nutritional content and outcome (glucose CV or glucose SD) based on a repeated measures linear regression model adjusting for HbA1c, outcome in 24 hours prior to meal, glucose at the start of the meal, insulin on board, grams of fiber, grams of carbohydrates, and main effect of nutritional content (carbohydrates, fat, protein) and insulin modality with an exchangeable correlation structure

**Supplemental Table S3. Effect of Exercise Following Meals and Macronutrients on Postprandial Glycemic Variability**

|                    | No Exercise |           | Exercise |           | Adjusted Mean Difference (95% CI) | Interaction P-value <sup>a</sup> |
|--------------------|-------------|-----------|----------|-----------|-----------------------------------|----------------------------------|
|                    | N           | Mean ± SD | N        | Mean ± SD |                                   |                                  |
| Glucose CV (%)     |             |           |          |           |                                   |                                  |
| Carbohydrates      |             |           |          |           |                                   | 0.21                             |
| <25 g              | 369         | 17% ± 8%  | 138      | 19% ± 10% | -3.4% (-6.3%, -0.6%)              |                                  |
| 25 to <50 g        | 451         | 17% ± 9%  | 152      | 20% ± 10% | -2.6% (-5.3%, 0.0%)               |                                  |
| 50 to <75 g        | 323         | 19% ± 10% | 135      | 22% ± 10% | -2.8% (-5.7%, 0.1%)               |                                  |
| ≥75 g              | 285         | 21% ± 11% | 127      | 21% ± 10% | 0.3% (-2.7%, 3.4%)                |                                  |
| Fat                |             |           |          |           |                                   | 0.41                             |
| <10 g              | 521         | 18% ± 9%  | 174      | 21% ± 10% | -2.8% (-5.3%, -0.4%)              |                                  |
| 10 to <30 g        | 576         | 18% ± 9%  | 239      | 21% ± 9%  | -3.0% (-5.2%, -0.8%)              |                                  |
| ≥30 g              | 331         | 19% ± 10% | 139      | 20% ± 9%  | -0.3% (-3.2%, 2.6%)               |                                  |
| Protein            |             |           |          |           |                                   | 0.20                             |
| <0.25 g/kg         | 734         | 18% ± 9%  | 266      | 21% ± 10% | -3.0% (-5.0%, -0.9%)              |                                  |
| 0.25 to <0.50 g/kg | 380         | 19% ± 9%  | 134      | 21% ± 10% | -2.6% (-5.4%, 0.2%)               |                                  |
| ≥0.50 g/kg         | 314         | 19% ± 10% | 152      | 20% ± 9%  | -0.6% (-3.4%, 2.2%)               |                                  |
| Glucose SD (mg/dL) |             |           |          |           |                                   |                                  |
| Carbohydrates      |             |           |          |           |                                   | 0.15                             |
| <25 g              | 369         | 25 ± 14   | 138      | 29 ± 19   | -5.4 (-10.4, -0.5)                |                                  |
| 25 to <50 g        | 451         | 27 ± 15   | 152      | 31 ± 17   | -3.8 (-8.4, 0.8)                  |                                  |
| 50 to <75 g        | 323         | 32 ± 18   | 135      | 33 ± 18   | -3.3 (-8.4, 1.7)                  |                                  |
| ≥75 g              | 285         | 33 ± 20   | 127      | 32 ± 17   | 2.0 (-3.2, 7.2)                   |                                  |
| Fat                |             |           |          |           |                                   | 0.30                             |
| <10 g              | 521         | 28 ± 16   | 174      | 31 ± 20   | -4.3 (-8.6, -0.0)                 |                                  |
| 10 to <30 g        | 576         | 29 ± 16   | 239      | 32 ± 17   | -3.6 (-7.4, 0.2)                  |                                  |
| ≥30 g              | 331         | 30 ± 18   | 139      | 29 ± 16   | 0.3 (-4.7, 5.2)                   |                                  |
| Protein            |             |           |          |           |                                   | 0.15                             |
| <0.25 g/kg         | 734         | 28 ± 16   | 266      | 32 ± 18   | -4.6 (-8.1, -1.1)                 |                                  |
| 0.25 to <0.50 g/kg | 380         | 30 ± 17   | 134      | 32 ± 18   | -2.8 (-7.7, 2.1)                  |                                  |
| ≥0.50 g/kg         | 314         | 30 ± 19   | 152      | 30 ± 17   | 0.3 (-4.6, 5.1)                   |                                  |

a - P-value on the effect of exercise after meal on the relationship between nutritional content and outcome (glucose CV or glucose SD) based on a repeated measures linear regression model adjusting for HbA1c, outcome in 24 hours prior to meal, glucose at the start of the meal, insulin on board, grams of fiber, grams of carbohydrates, and main effect of nutritional content (carbohydrates, fat, protein) and exercise status with an exchangeable correlation structure

**Supplemental Table S4. Effect of Exercise Intensity and Macronutrients on Postprandial Glycemic Variability**

|                           | No Exercise |               | Low Intensity |               | Medium Intensity |               | High Intensity |               |
|---------------------------|-------------|---------------|---------------|---------------|------------------|---------------|----------------|---------------|
|                           | N           | Mean $\pm$ SD | N             | Mean $\pm$ SD | N                | Mean $\pm$ SD | N              | Mean $\pm$ SD |
| <b>Glucose CV (%)</b>     |             |               |               |               |                  |               |                |               |
| Carbohydrates             |             |               |               |               |                  |               |                |               |
| <25 g                     | 369         | 17% $\pm$ 8%  | 43            | 19% $\pm$ 11% | 77               | 20% $\pm$ 10% | 18             | 21% $\pm$ 10% |
| 25 to <50 g               | 451         | 17% $\pm$ 9%  | 41            | 21% $\pm$ 10% | 97               | 20% $\pm$ 9%  | 14             | 22% $\pm$ 9%  |
| 50 to <75 g               | 323         | 19% $\pm$ 10% | 36            | 20% $\pm$ 9%  | 88               | 22% $\pm$ 10% | 11             | 19% $\pm$ 7%  |
| $\geq$ 75 g               | 285         | 21% $\pm$ 11% | 45            | 20% $\pm$ 7%  | 68               | 22% $\pm$ 10% | 14             | 23% $\pm$ 15% |
| Fat                       |             |               |               |               |                  |               |                |               |
| <10 g                     | 521         | 18% $\pm$ 9%  | 46            | 20% $\pm$ 11% | 106              | 21% $\pm$ 10% | 22             | 20% $\pm$ 8%  |
| 10 to <30 g               | 576         | 18% $\pm$ 9%  | 72            | 21% $\pm$ 9%  | 147              | 21% $\pm$ 9%  | 20             | 23% $\pm$ 12% |
| $\geq$ 30 g               | 331         | 19% $\pm$ 10% | 47            | 17% $\pm$ 8%  | 77               | 21% $\pm$ 10% | 15             | 20% $\pm$ 11% |
| Protein                   |             |               |               |               |                  |               |                |               |
| <0.25 g/kg                | 734         | 18% $\pm$ 9%  | 78            | 20% $\pm$ 10% | 162              | 21% $\pm$ 10% | 26             | 20% $\pm$ 9%  |
| 0.25 to <0.50 g/kg        | 380         | 19% $\pm$ 9%  | 39            | 19% $\pm$ 9%  | 78               | 21% $\pm$ 10% | 17             | 23% $\pm$ 13% |
| $\geq$ 0.50 g/kg          | 314         | 19% $\pm$ 10% | 48            | 19% $\pm$ 10% | 90               | 20% $\pm$ 9%  | 14             | 20% $\pm$ 11% |
| <b>Glucose SD (mg/dL)</b> |             |               |               |               |                  |               |                |               |
| Carbohydrates             |             |               |               |               |                  |               |                |               |
| <25 g                     | 369         | 25 $\pm$ 14   | 43            | 28 $\pm$ 21   | 77               | 29 $\pm$ 17   | 18             | 32 $\pm$ 20   |
| 25 to <50 g               | 451         | 27 $\pm$ 15   | 41            | 36 $\pm$ 19   | 97               | 30 $\pm$ 16   | 14             | 28 $\pm$ 11   |
| 50 to <75 g               | 323         | 32 $\pm$ 18   | 36            | 32 $\pm$ 20   | 88               | 34 $\pm$ 18   | 11             | 28 $\pm$ 19   |
| $\geq$ 75 g               | 285         | 33 $\pm$ 20   | 45            | 31 $\pm$ 15   | 68               | 33 $\pm$ 18   | 14             | 29 $\pm$ 17   |
| Fat                       |             |               |               |               |                  |               |                |               |
| <10 g                     | 521         | 28 $\pm$ 16   | 46            | 33 $\pm$ 23   | 106              | 31 $\pm$ 19   | 22             | 29 $\pm$ 19   |
| 10 to <30 g               | 576         | 29 $\pm$ 16   | 72            | 35 $\pm$ 19   | 147              | 31 $\pm$ 16   | 20             | 32 $\pm$ 17   |
| $\geq$ 30 g               | 331         | 30 $\pm$ 18   | 47            | 26 $\pm$ 15   | 77               | 31 $\pm$ 17   | 15             | 26 $\pm$ 13   |
| Protein                   |             |               |               |               |                  |               |                |               |
| <0.25 g/kg                | 734         | 28 $\pm$ 16   | 78            | 33 $\pm$ 19   | 162              | 31 $\pm$ 17   | 26             | 31 $\pm$ 20   |
| 0.25 to <0.50 g/kg        | 380         | 30 $\pm$ 17   | 39            | 31 $\pm$ 20   | 78               | 33 $\pm$ 18   | 17             | 30 $\pm$ 16   |
| $\geq$ 0.50 g/kg          | 314         | 30 $\pm$ 19   | 48            | 31 $\pm$ 18   | 90               | 30 $\pm$ 16   | 14             | 26 $\pm$ 12   |
